# Supplementary material for: Arctic glacier snowline altitudes rise 150 meters over the last four decades
Source: Copernicus journal article supplement (doi:10.5194/egusphere-2024-522), 2024-03-01
Supplement: Supplementary file 1 [file egusphere-2024-522-supplement.pdf]

## Supplementary Information

### Arctic glacier snowline altitudes rise 150 meters over the last four decades

Laura J. Larocca<sup>1,2,3</sup>, James M. Lea<sup>4</sup>, Michael P. Erb<sup>1</sup>, Nicholas P. McKay<sup>1</sup>, Megan Phillips<sup>1</sup>, Kara A. Lamantia<sup>5,6</sup>, Darrell S. Kaufman<sup>1</sup>

<sup>1</sup>School of Earth and Sustainability, Northern Arizona University, Flagstaff, AZ 86011, USA

<sup>2</sup>The Cooperative Programs for the Advancement of Earth System Science, University Cooperation for Atmospheric Research, Boulder, CO 80307, USA

<sup>3</sup>School of Ocean Futures, Arizona State University, Tempe, AZ 85281, USA

<sup>4</sup>Department of Geography and Planning, University of Liverpool, Liverpool, UK

<sup>5</sup>Byrd Polar and Climate Research Center, Ohio State University, Columbus, OH, USA

<sup>6</sup>School of Earth Sciences, Ohio State University, Columbus, OH, USA

Correspondence to: Laura J. Larocca (LJLarocc@asu.edu)

#### Contents

**Table S1:** Glaciers with long-term measurements of ELA

**Table S2:** Zero-order correlations ( $r$ ) between detrended normalized composite time series of late-summer snowline altitude, and annual and seasonal climate variables for grid cells in “wet” and “dry” settings

**Figure S1:** Number of snowline altitude observations per year between 1984 and 2022

**Figure S2:** Comparison of morpho-topographic variables for study glaciers versus the entire Arctic glacier population

**Figure S3:** Distribution of the rate of snowline altitude change

**Figure S4:** Relationship between glacier snowline altitude change and glacier topographic setting

**Figure S5:** Distribution of snowline observations per month between 1984 and 2022

**Figure S6:** Estimated cumulative glacier surface elevation change between 1984 and 2022

**Figure S7:** Relationships between rate of snowline altitude change and glacier morpho-topographic variables

**Table S1.** Glaciers with long-term measurements of ELA

| ID             | Region              | Name                 | # of years with ELA measurements between 1984-2022 |
|----------------|---------------------|----------------------|----------------------------------------------------|
| RGI60-05.11186 | Greenland           | Mittivakkat Glacier  | 24                                                 |
| RGI60-03.02435 | Arctic Canada North | Devon Ice Cap NW     | 30                                                 |
| RGI60-03.04539 | Arctic Canada North | White Glacier        | 35                                                 |
| RGI60-01.00570 | Alaska              | Gulkana Glacier      | 37                                                 |
| RGI60-01.09162 | Alaska              | Wolverine Glacier    | 37                                                 |
| RGI60-07.00504 | Svalbard            | Austre Broeggerbreen | 37                                                 |
| RGI60-07.00240 | Svalbard            | Hansbreen            | 29                                                 |
| RGI60-07.00493 | Svalbard            | Midtre Lovenbreen    | 37                                                 |
| RGI60-07.01481 | Svalbard            | Kongsvegen           | 34                                                 |
| RGI60-08.00199 | Scandinavia         | Marmaglacieraen      | 27                                                 |
| RGI60-08.00006 | Scandinavia         | Riukojietna          | 30                                                 |
| RGI60-08.00188 | Scandinavia         | Rabots Glaciaer      | 31                                                 |
| RGI60-08.00213 | Scandinavia         | Storglacieraen       | 36                                                 |

|                |             |                                            |    |
|----------------|-------------|--------------------------------------------|----|
| RGI60-08.02666 | Scandinavia | Aalfotbreen                                | 37 |
| RGI60-08.01286 | Scandinavia | Austdalsbreen                              | 33 |
| RGI60-08.01657 | Scandinavia | Engabreen                                  | 37 |
| RGI60-08.00987 | Scandinavia | Graasubreen                                | 37 |
| RGI60-08.02650 | Scandinavia | Hansebreen                                 | 34 |
| RGI60-08.01779 | Scandinavia | Rembesdalskaaka/Hardanger                  | 37 |
| RGI60-08.00449 | Scandinavia | Hellstugubreen                             | 37 |
| RGI60-08.01258 | Scandinavia | Langfjordjoekulen                          | 30 |
| RGI60-08.01126 | Scandinavia | Nigardsbreen                               | 37 |
| RGI60-08.00312 | Scandinavia | Storbreen                                  | 37 |
| RGI60-06.00377 | Iceland     | Bruarjoekull                               | 24 |
| RGI60-06.00472 | Iceland     | Eyjabakkajoekull                           | 26 |
| RGI60-06.00238 | Iceland     | Hofsjoekull N                              | 29 |
| RGI60-06.00234 | Iceland     | Thjorsarjoekull (Hofsjoekull E)            | 31 |
| RGI60-06.00236 | Iceland     | Blagnipujoekull (Hofsjoekull SW)           | 28 |
| RGI60-06.00309 | Iceland     | Hagafellsjoekull East (Langjoekull S Dome) | 21 |
| RGI60-06.00443 | Iceland     | Tungnaarjoekull                            | 24 |

Note: ELA data from Ohmura and Boettcher (2022).

**Table S2.** Zero-order correlations ( $r$ ) between detrended normalized composite time series of late-summer snowline altitude, and annual and seasonal climate variables for grid cells in “wet” and “dry” settings

|               | Wet         |              | Dry         |              |
|---------------|-------------|--------------|-------------|--------------|
|               | Temperature | Snowfall     | Temperature | Snowfall     |
| <i>Annual</i> | 0.21        | -0.25        | 0.20        | -0.21        |
| <i>Summer</i> | <b>0.50</b> | <b>-0.54</b> | <b>0.42</b> | <b>-0.40</b> |
| <i>Fall</i>   | 0.14        | -0.21        | 0.01        | 0.15         |
| <i>Winter</i> | -0.04       | -0.09        | 0.26        | -0.13        |
| <i>Spring</i> | 0.04        | -0.03        | 0.12        | -0.03        |

Bold values are significant ( $p < 0.05$ ;  $n = 39$ ). Wet (Dry) grid cells are defined as those with mean annual precipitation totals of  $>785$  ( $<785$ ) mm w.e. per year.

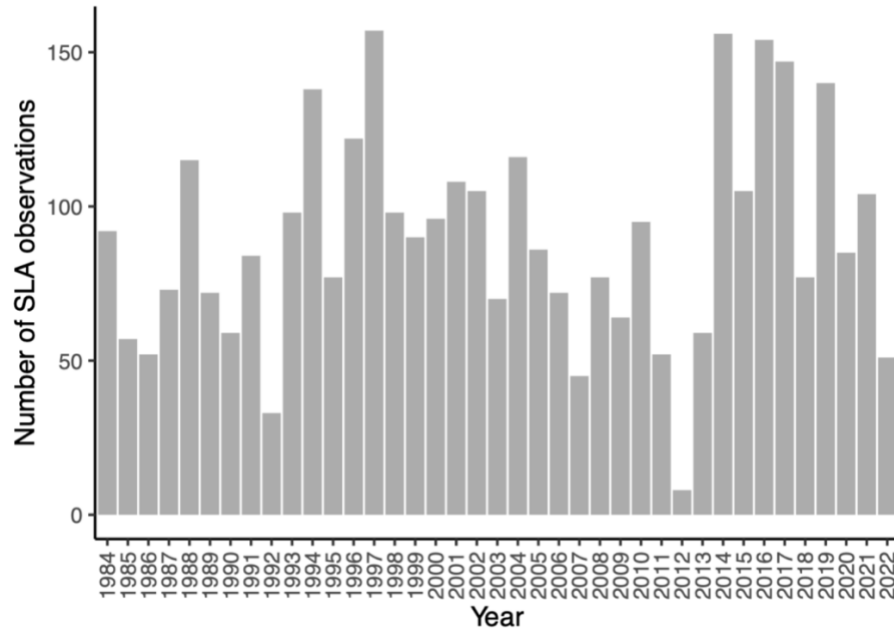

**Figure S1.** Number of snowline altitude observations per year between 1984 and 2022. The total number of snowlines delineated over the 39-year observational period is  $n=3489$ . The least number of snowlines were delineated in 2012 ( $n=8$ ). The greatest number of snowlines were delineated in 1997 ( $n=157$ ). There is no significant trend in the number of snowlines delineated over time.

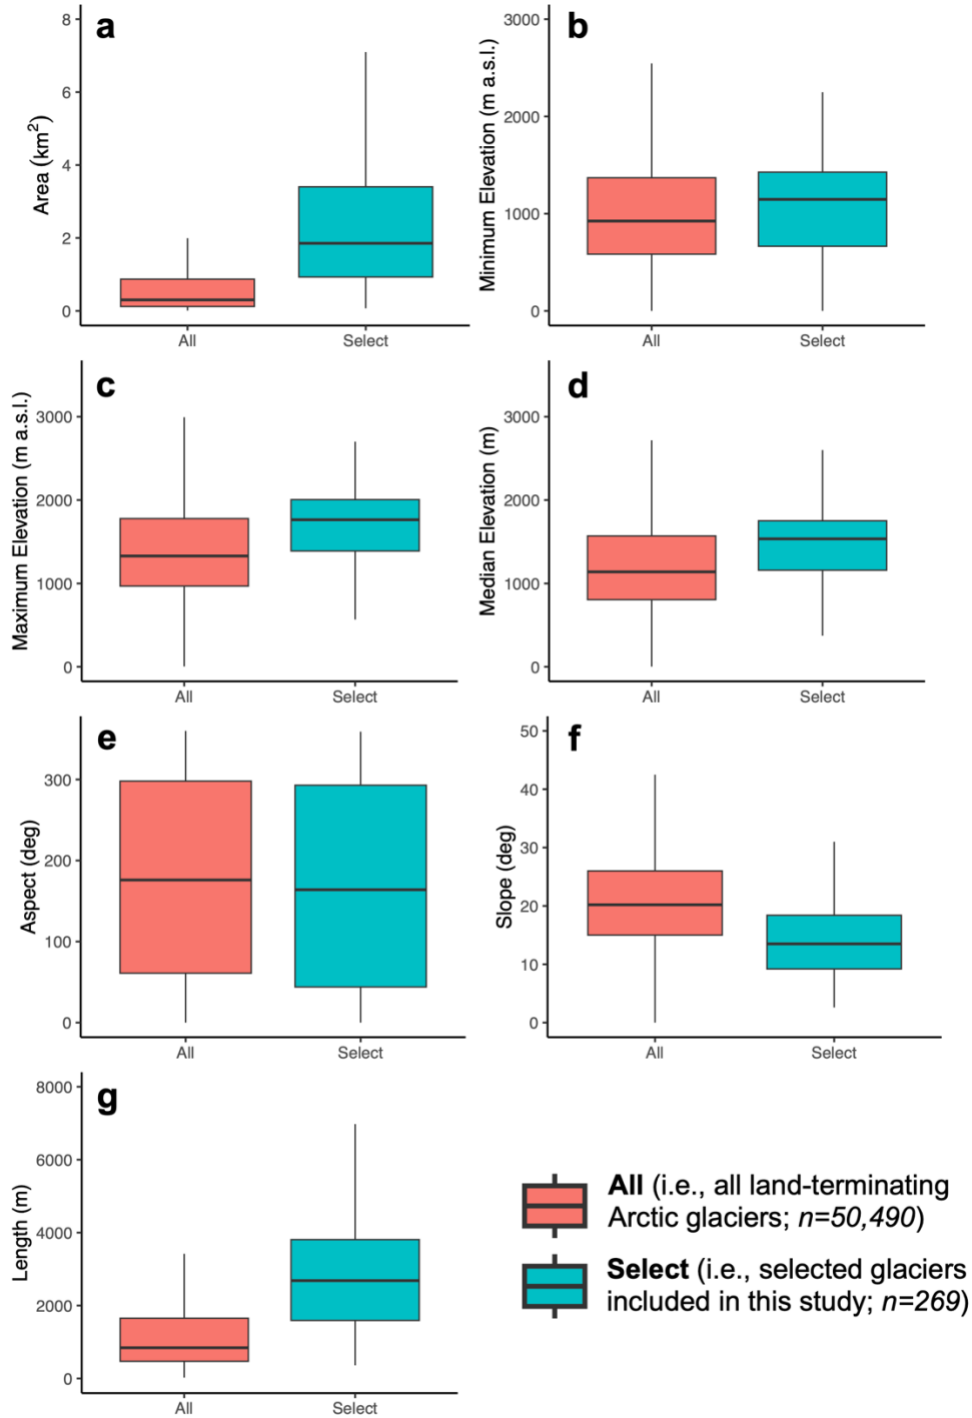

**Figure S2.** Comparison of morpho-topographic variables for study glaciers versus the entire Arctic glacier population. Glacier (a) area, (b) minimum elevation, (c) maximum elevation, (d) median elevation, (e) aspect, (f) slope, and (g) length are shown for two groups: All land-terminating glaciers (i.e., Form=0; TermType=0) across the Arctic located above 60°N (red; n=50,490) and glaciers studied here (blue; n=269). Morpho-topographic variables are from the Randolph Glacier Inventory (RGI) Version 6. In each box plot the center line represents the median, the edges of the box represent the first and third quartiles, and the whiskers extend to span a 1.5 interquartile range from the edges. Outliers are not shown.

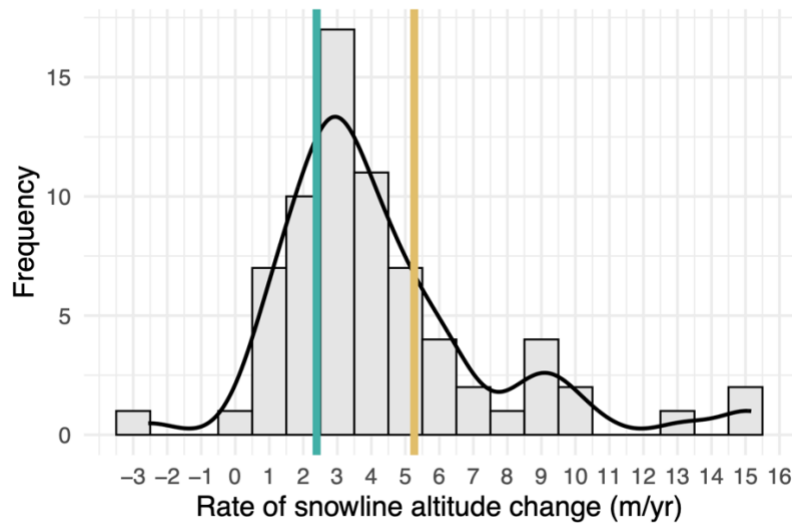

**Figure S3.** Distribution of the rate of snowline altitude change. Green line and yellow lines mark the boundaries of the lower and upper 25% of the distribution, respectively. Black curve is the kernel density estimate, a smoothed approximation of the histogram. Rates are gridded mean values.

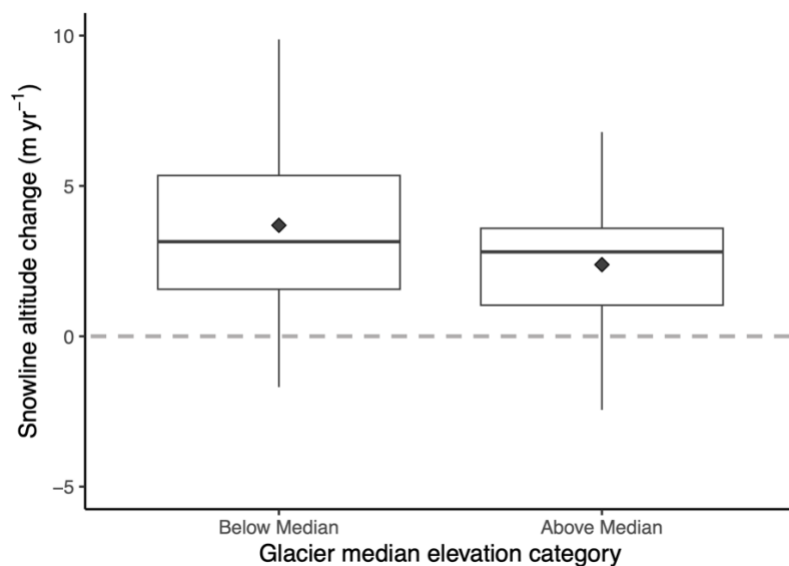

**Figure S4.** Relationship between glacier snowline altitude change and glacier topographic setting. Rate of snowline altitude change for two categories: Glaciers situated at relatively low elevations (where the median elevation is  $<1535\text{ m}$ ) and glaciers situated at relatively high elevations (where the median elevation is  $>1535\text{ m}$ ). The categories were defined based on the median of the median elevation across all study glaciers. The box plot center lines represent the median, the edges of the box represent the first and third quartiles, and the whiskers extend to span a 1.5 interquartile range from the edges. The means are denoted by the gray diamonds. Outliers are not shown.

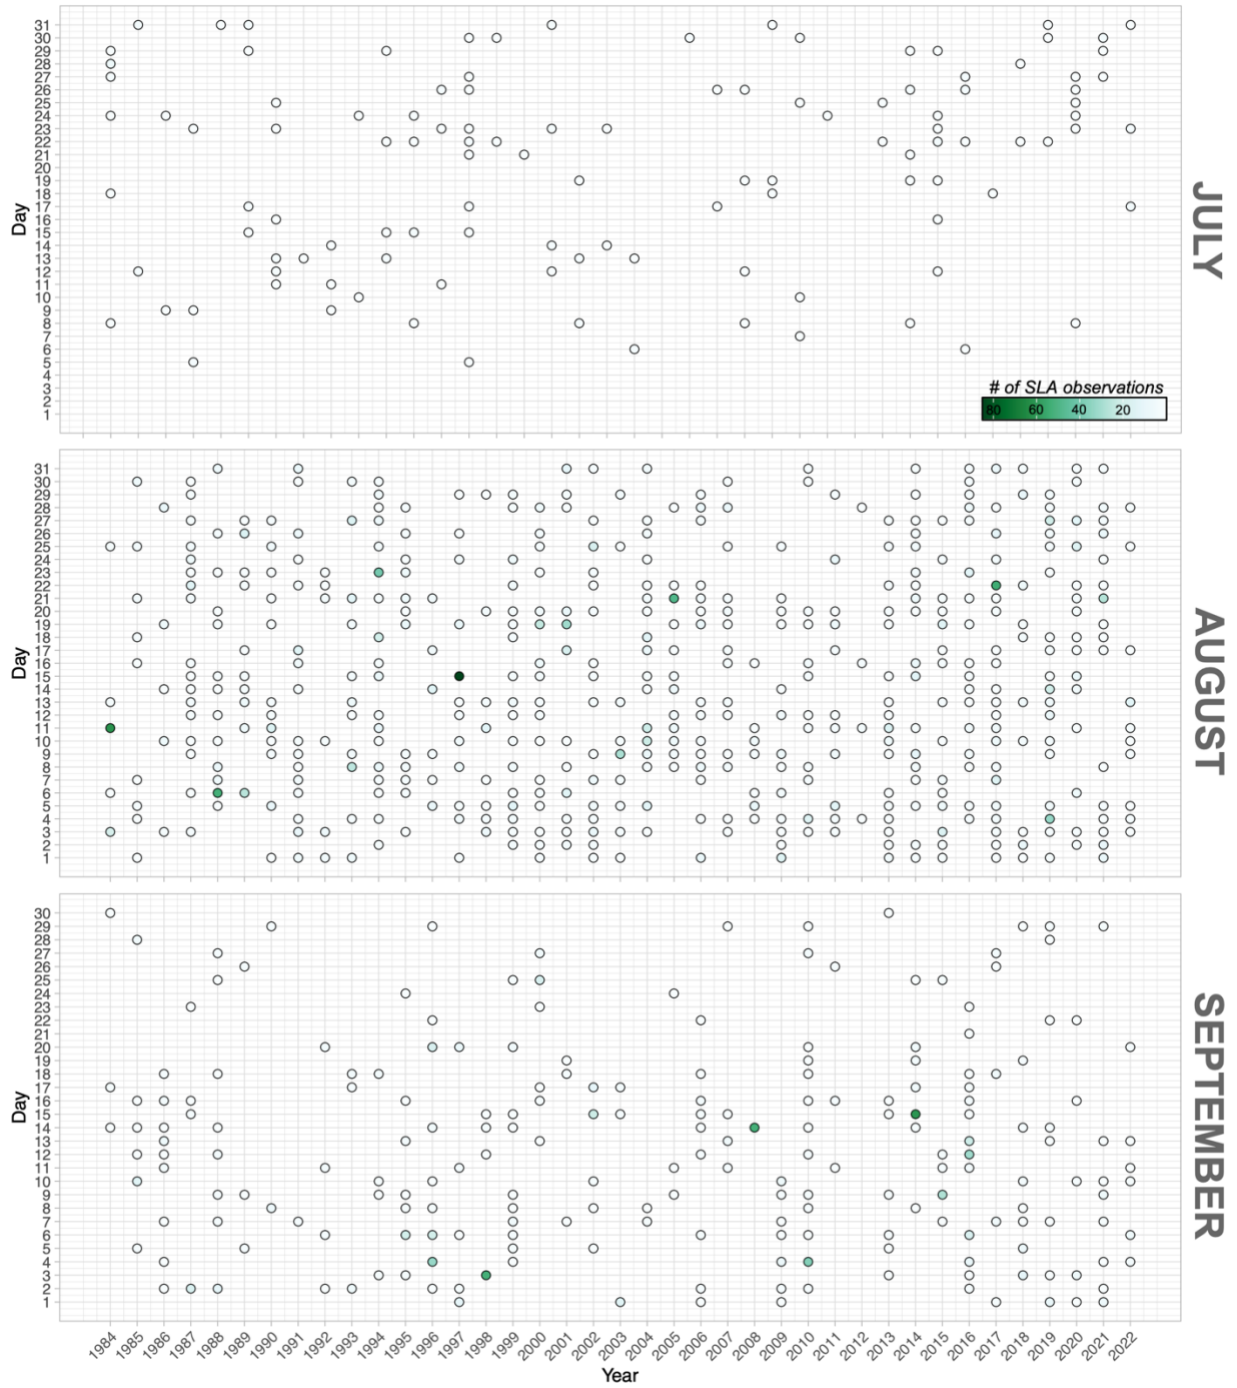

**Figure S5.** Distribution of snowline observations per month between 1984 and 2022. The colored bar indicates the number of observations made per day in the months of July, August, and September.

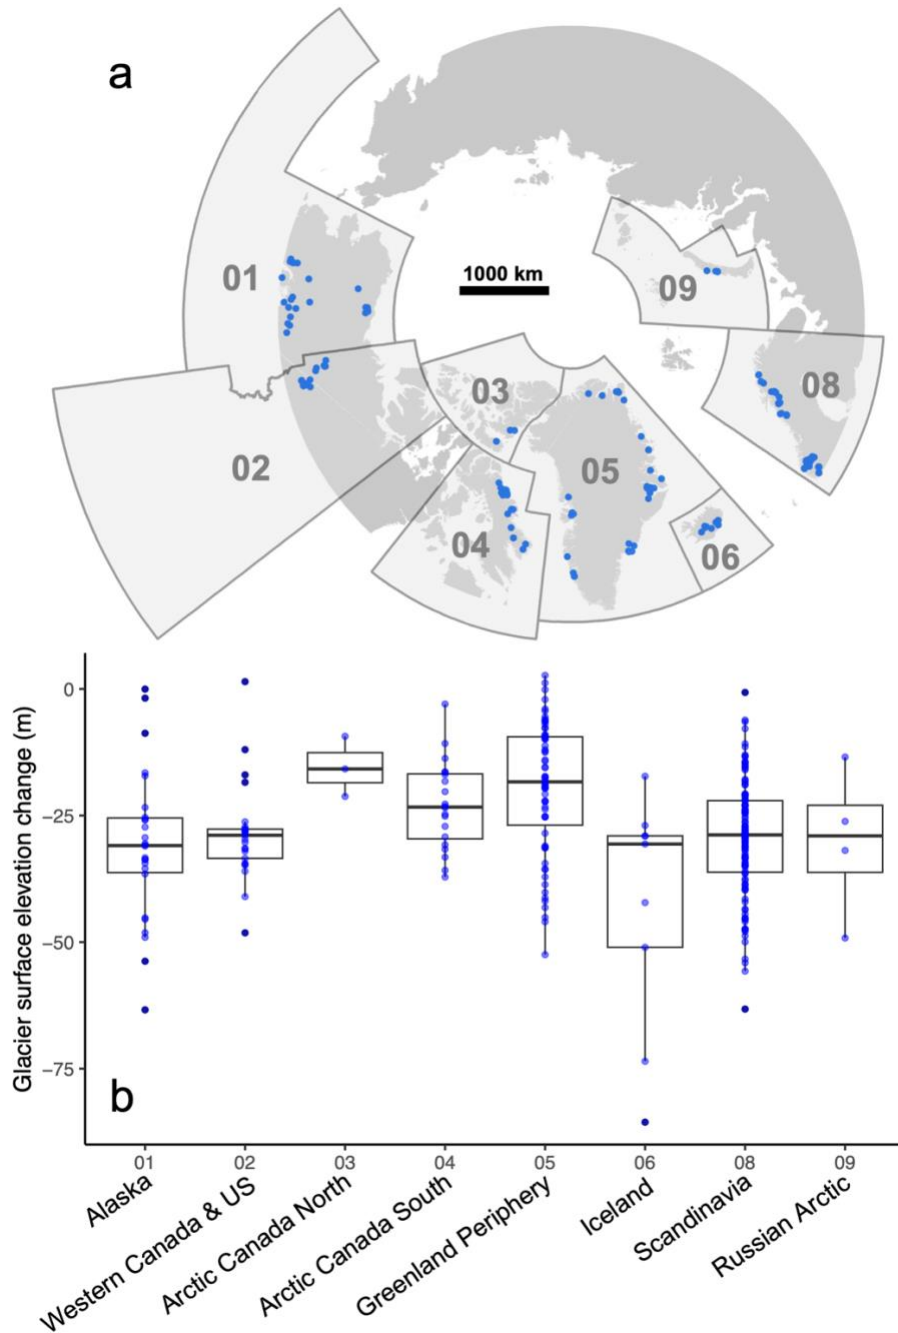

**Figure S6.** Estimated cumulative glacier surface elevation change between 1984 and 2022. **(a)** Map of eight first order regions defined by the Randolph Glacier Inventory (RGI Consortium, 2017) Version 6 in which our study glaciers fall (blue dots). **(b)** Glacier surface elevation change in meters (m) at each of our 269 study glaciers (blue dots) was estimated using the elevation change rate in meters per year (dhdt) for 2000-2020 as reported by Hugonnet et al. (2021) multiplied by the number of years in our observational period (i.e., 39 years). We suggest this represents a maximum constraint on glacier surface lowering as changes were very likely larger in the 21<sup>st</sup> century than prior. From west to east, Arctic regions are as follows: 01 Alaska; 02 Western Canada and US; 03 Arctic Canada North; 04 Arctic Canada South; 05 Greenland Periphery; 06 Iceland; 08 Scandinavia; and 09 Russian Arctic. In each box plot the center line represents the median, the edges of the box represent the first and third quartiles, and the whiskers extend to span a 1.5 interquartile range from the edges.

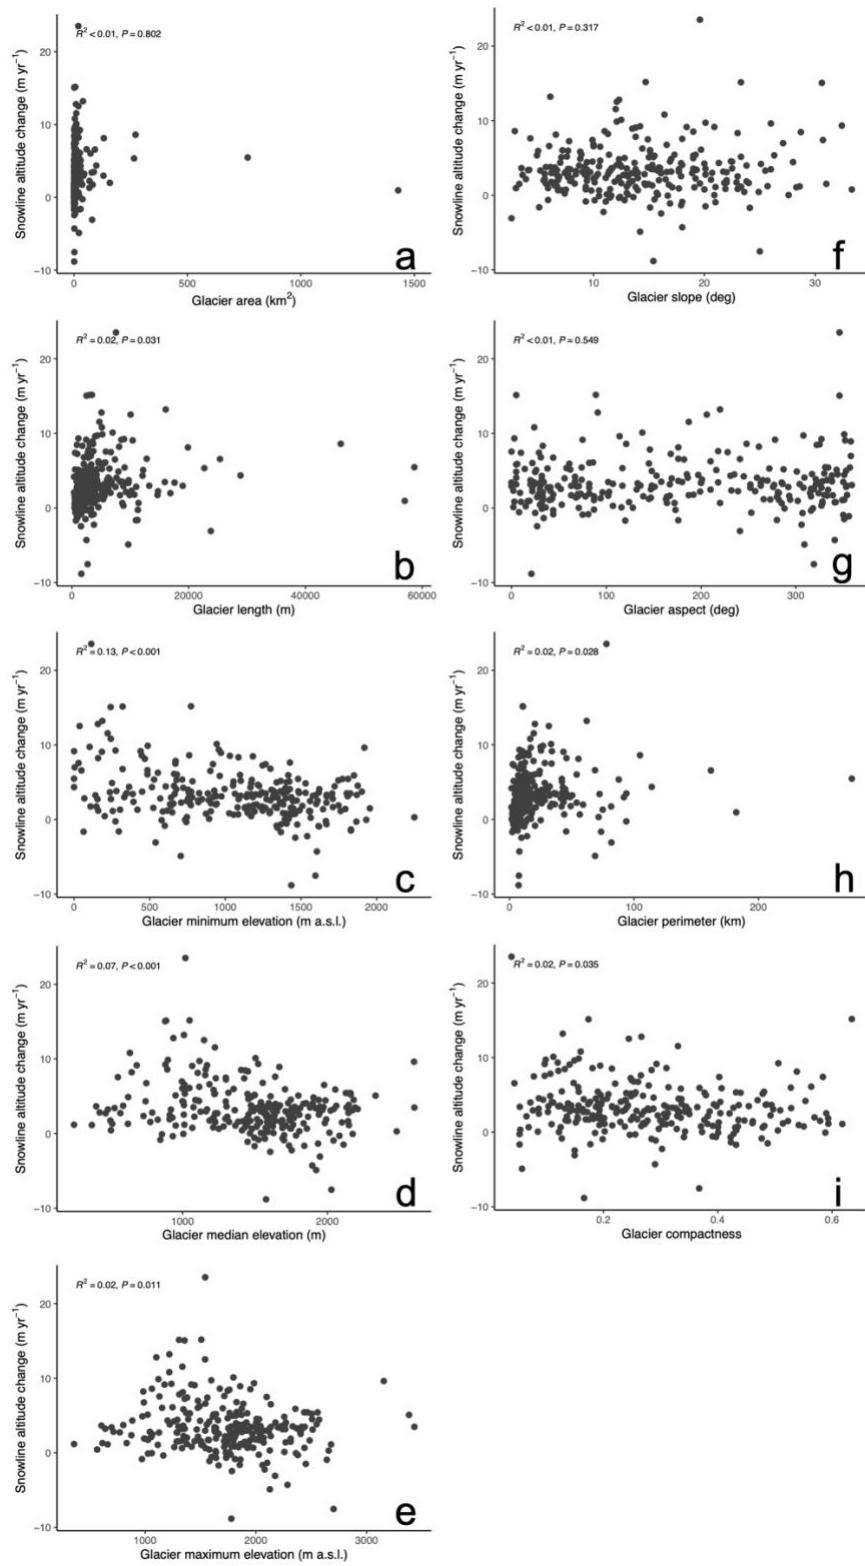

**Figure S7.** Relationships between rate of snowline altitude change and glacier morpho-topographic variables. Glacier (a) area; (b) length; (c) minimum elevation; (d) median elevation; (e) maximum elevation; (f) slope; (g) aspect; (h) perimeter; and (i) compactness.



## References

Hugonnet, R., McNabb, R., Berthier, E., Menounos, B., Nuth, C., Girod, L., Farinotti, D., Huss, M., Dussailant, I., Brun, F. and Kääb, A.: Accelerated global glacier mass loss in the early twenty-first century. *Nature*, 592(7856), pp.726–731, 2021.

Ohmura, A. and Boettcher, M.: On the Shift of Glacier Equilibrium Line Altitude (ELA) under the Changing Climate. *Water*, 14(18), p.2821, 2022.

RGI Consortium, Randolph Glacier Inventory – A Dataset of Global Glacier Outlines, Version 6.: Distributed by National Snow and Ice Data Center. <https://doi.org/10.7265/4m1f-gd79>, 2017.
